# Supplementary material for: Differences in local immune cell landscape between Q fever and atherosclerotic abdominal aortic aneurysms identified by multiplex immunohistochemistry
Source: eLife. 2022 Feb 9;11:e72486. doi: 10.7554/eLife.72486 (PMC8871373; doi:10.7554/eLife.72486)
Supplement: Figure 3—source data 1. [file elife-72486-fig3-data1.xlsx]

## Sheet: Data figure 3 cell markers
	Normal aorta	Normal aorta	Normal aorta	Normal aorta	Normal aorta	Atherosclerotic AAA	Atherosclerotic AAA	Atherosclerotic AAA	Atherosclerotic AAA	Atherosclerotic AAA	Atherosclerotic AAA	Atherosclerotic AAA	Atherosclerotic AAA	Atherosclerotic AAA	Atherosclerotic AAA	Atherosclerotic AAA	Atherosclerotic AAA	Q Fever infected AAA	Q Fever infected AAA	Q Fever infected AAA	Q Fever infected AAA	Q Fever infected AAA	Q Fever infected AAA	Q Fever infected AAA	Q Fever infected AAA	Q Fever infected AAA	Q Fever infected AAA	Acute infection of AAA	Acute infection of AAA
T cells	0.89	3.13	1.02	1.32	2.93	11.33	9.07	35.76	7.19	excluded	11.92	38.4	33.01	10.29	22.41	38.95	13.59	21.95	28.18	18.59	16.41	16.57	21.33	19.52	19.05	6.45	28.04	19.59	7.36
B cells	0.05	0.16	0.8	0.4	0.44	3.83	4.41	13.86	3.45	excluded	6.84	23.81	14.06	3.96	37.08	13.62	9.53	7.13	34.46	2.13	7.44	9.28	30.23	12.59	12.98	0.81	5.47	3.07	0.6
cDC2	0.22	0.44	0.28	0.26	0.58	0.36	0.39	0.77	1.02	excluded	0.61	0.96	0.53	0.22	1.02	1.14	0.44	0.3	0.52	0.13	0.56	0.43	0.28	0.22	0.48	0.37	0.04	0.06	0.38
Neutrophils	1.35	2.29	0.74	1.38	1.5	5.34	39.66	11.51	17.17	11.01	11.03	3.51	1.31	9.5	2.17	9.8	12.64	8.79	2.28	8.81	8.76	18.79	7.83	9.97	7.02	11.05	8.51	45.82	10.6
Macrophages	6.72	11	5.49	8.8	8.36	3.3	7.31	13.27	7.21	11.55	15.09	14.81	9.31	9.32	12.51	15.36	9.29	6.45	14.11	14.11	7.16	11.14	13.22	18.32	15.69	7.56	10.23	10.07	14.76
