# Supplementary material for: Differences in local immune cell landscape between Q fever and atherosclerotic abdominal aortic aneurysms identified by multiplex immunohistochemistry
Source: eLife. 2022 Feb 9;11:e72486. doi: 10.7554/eLife.72486 (PMC8871373; doi:10.7554/eLife.72486)
Supplement: Figure 5—source data 1. [file elife-72486-fig5-data1.xlsx]

## Sheet: Data figure 5 macrophage subset
	Atherosclerotic AAA	Atherosclerotic AAA	Atherosclerotic AAA	Atherosclerotic AAA	Atherosclerotic AAA	Atherosclerotic AAA	Atherosclerotic AAA	Atherosclerotic AAA	Atherosclerotic AAA	Atherosclerotic AAA	Atherosclerotic AAA	Atherosclerotic AAA	Q Fever infected AAA	Q Fever infected AAA	Q Fever infected AAA	Q Fever infected AAA	Q Fever infected AAA	Q Fever infected AAA	Q Fever infected AAA	Q Fever infected AAA	Q Fever infected AAA	Q Fever infected AAA
M1	62.68	67.5	78.4	48.18	45.51	54.82	55.65	69.28	61.76	60.72	74.95	62.03	44.16	40.66	35.97	57.67	34.49	38.31	39.24	38.68	48.42	54.28
M2	37.32	32.5	21.6	51.82	54.49	45.18	44.35	30.72	38.24	39.28	25.05	37.97	55.84	59.34	64.03	42.33	65.51	61.69	60.76	61.32	51.58	45.72

## Sheet: Data figure 5 macrophages
	Atherosclerotic AAA	Atherosclerotic AAA	Atherosclerotic AAA	Atherosclerotic AAA	Atherosclerotic AAA	Atherosclerotic AAA	Atherosclerotic AAA	Atherosclerotic AAA	Atherosclerotic AAA	Atherosclerotic AAA	Atherosclerotic AAA	Atherosclerotic AAA	Q Fever infected AAA	Q Fever infected AAA	Q Fever infected AAA	Q Fever infected AAA	Q Fever infected AAA	Q Fever infected AAA	Q Fever infected AAA	Q Fever infected AAA	Q Fever infected AAA	Q Fever infected AAA
Macrophages	3.3	7.31	13.27	7.21	11.55	15.09	14.81	9.31	9.32	12.51	15.36	9.29	6.45	14.11	14.11	7.16	11.14	13.22	18.32	15.69	7.56	10.23
