# Supplementary material for: Differences in local immune cell landscape between Q fever and atherosclerotic abdominal aortic aneurysms identified by multiplex immunohistochemistry
Source: eLife. 2022 Feb 9;11:e72486. doi: 10.7554/eLife.72486 (PMC8871373; doi:10.7554/eLife.72486)
Supplement: Figure 6—source data 1. [file elife-72486-fig6-data1.xlsx]

## Sheet: Data figure 6 GMCSF
	Atherosclerotic AAA	Atherosclerotic AAA	Atherosclerotic AAA	Atherosclerotic AAA	Atherosclerotic AAA	Atherosclerotic AAA	Atherosclerotic AAA	Atherosclerotic AAA	Atherosclerotic AAA	Atherosclerotic AAA	Atherosclerotic AAA	Atherosclerotic AAA	Q Fever infected AAA	Q Fever infected AAA	Q Fever infected AAA	Q Fever infected AAA	Q Fever infected AAA	Q Fever infected AAA	Q Fever infected AAA	Q Fever infected AAA	Q Fever infected AAA	Q Fever infected AAA
GM-CSF per macrophage	9.79	1.43	0.54	3.17	2.5	3.28	0.88	0.84	0.47	1.48	1.93	1.51	0.91	0.42	0.42	0.32	1.01	0.2	0.28	0.46	1.12	2.56
GM-CSF per M1	0.52	0.15	0.09	0.47	0.64	0.9	0.23	0.11	0.07	0.31	0.4	0.23	0.13	0.14	0.16	0.04	0.33	0.07	0.13	0.19	0.17	0.48
GM-CSF per M2	0.87	0.32	0.33	0.44	0.53	1.1	0.29	0.26	0.11	0.47	1.19	0.37	0.1	0.1	0.09	0.05	0.17	0.04	0.09	0.12	0.16	0.57
