# Supplementary material for: Differences in local immune cell landscape between Q fever and atherosclerotic abdominal aortic aneurysms identified by multiplex immunohistochemistry
Source: eLife. 2022 Feb 9;11:e72486. doi: 10.7554/eLife.72486 (PMC8871373; doi:10.7554/eLife.72486)
Supplement: Figure 7—source data 1. [file elife-72486-fig7-data1.xlsx]

## Sheet: Data figure 7 T cells infiltrat
	Atherosclerotic AAA	Atherosclerotic AAA	Atherosclerotic AAA	Atherosclerotic AAA	Atherosclerotic AAA	Atherosclerotic AAA	Atherosclerotic AAA	Atherosclerotic AAA	Atherosclerotic AAA	Atherosclerotic AAA	Atherosclerotic AAA	Atherosclerotic AAA	Q Fever infected AAA	Q Fever infected AAA	Q Fever infected AAA	Q Fever infected AAA	Q Fever infected AAA	Q Fever infected AAA	Q Fever infected AAA	Q Fever infected AAA	Q Fever infected AAA	Q Fever infected AAA
Cytotoxic T cells	223.99	201.34	330.28	211.15	excluded	199.89	228.28	1375.49	236.46	504.7	1035.9	210.67	2309.05	1100.59	3394.11	1755.35	1335.32	1002.93	1217.48	1232.8	653.25	2212.51
Regulatory T cells	159.65	444.55	1385.99	213.66	excluded	183.64	1219.47	567.62	469.19	147	787.13	310.29	415.56	959.01	177.79	271.76	1592.38	845.04	977.62	673.35	317.57	419.12

## Sheet: Date figure 7 T cells tissue
	Atherosclerotic AAA	Atherosclerotic AAA	Atherosclerotic AAA	Atherosclerotic AAA	Atherosclerotic AAA	Atherosclerotic AAA	Atherosclerotic AAA	Atherosclerotic AAA	Atherosclerotic AAA	Atherosclerotic AAA	Atherosclerotic AAA	Atherosclerotic AAA	Q Fever infected AAA	Q Fever infected AAA	Q Fever infected AAA	Q Fever infected AAA	Q Fever infected AAA	Q Fever infected AAA	Q Fever infected AAA	Q Fever infected AAA	Q Fever infected AAA	Q Fever infected AAA
Cytotoxic T cells	11.55	13.73	39.28	21.57	8.44	5.5	13.84	267.7	10.11	24.41	25.67	18.04	86.49	65.66	265.47	157.4	75.98	55.12	58.85	53.2	46.13	165.39
Regulatory T cells	4.39	2.55	13.13	2.89	5.8	3.2	4.77	61.45	0.89	1.4	7.58	5.16	9.57	15.53	20.02	30.67	28.58	12.73	26.79	9	12.71	20.94

## Sheet: Data figure 7 percentages
	Atherosclerotic AAA	Atherosclerotic AAA	Atherosclerotic AAA	Atherosclerotic AAA	Atherosclerotic AAA	Atherosclerotic AAA	Atherosclerotic AAA	Atherosclerotic AAA	Atherosclerotic AAA	Atherosclerotic AAA	Atherosclerotic AAA	Atherosclerotic AAA	Q Fever infected AAA	Q Fever infected AAA	Q Fever infected AAA	Q Fever infected AAA	Q Fever infected AAA	Q Fever infected AAA	Q Fever infected AAA	Q Fever infected AAA	Q Fever infected AAA	Q Fever infected AAA
T cells	11.33	9.07	35.76	7.19	excluded	11.92	38.4	33.01	10.29	22.41	38.95	13.59	21.95	28.18	18.59	16.41	16.57	21.33	19.52	19.05	6.45	28.04
Cytotoxic T cells	7.36	11.22	7.07	21.04	excluded	5.04	3.89	31.23	9.21	9.46	10	10.19	38.34	20.43	48.81	38.55	25.01	18.14	20.49	21.14	33.8	37.25
Helper T cells	92.64	88.78	92.93	78.96	excluded	94.96	96.11	68.77	90.79	90.54	90	89.81	61.66	79.57	51.19	61.45	74.99	81.86	79.51	78.86	66.2	62.75
Regulatory T cells	3.58	7.58	11.74	6.78	excluded	3.51	14.06	9.47	4.73	2.22	7.16	5.84	6.38	14.83	3.51	6.89	16.13	10.99	12.68	8.84	10.29	6.19
CD45RO positive T cells	31.07	18.53	14.54	8.58	excluded	23.61	16.59	23.28	23.52	25.74	6.16	17.09	9.2	15.99	12.65	8.28	10.26	4.55	7.34	8.11	5.32	1.63
CD45RO negative T cells	68.93	81.47	85.46	91.42	excluded	76.39	83.41	76.72	76.48	74.26	93.84	82.91	90.8	84.01	87.35	91.72	89.74	95.45	92.66	91.89	94.68	98.37
