# Supplementary material for: Differences in local immune cell landscape between Q fever and atherosclerotic abdominal aortic aneurysms identified by multiplex immunohistochemistry
Source: eLife journal article supplement (doi:10.7554/elife.72486), 2022-02-09
Supplement: supp [file elife_poa_e72486_Source_code_1.docx]

PCA script R

Please see [https://CRAN.R-project.org/package=factoextra](https://cran.r-project.org/package=factoextra)

pca = prcomp(data)

** Visualisation **

fviz_pca_ind(res.pca,
             geom.ind = "point",
             col.ind = groups,
             palette = c("HIER DE KLEURCODES VAN HET BLADTOEVOEGEN"),
             addEllipses = TRUE,
             ellipse.type = "confidence",
             legend.title = "Groups",
)
